# Supplementary material for: Ecologically relevant thermal fluctuations enhance offspring fitness: biological and methodological implications for studies of thermal developmental plasticity
Source: Oxford University Press journal article supplement (doi:10.1242/jeb.231902), 2020-01-01
Supplement: jeb231902supp.pdf [file jeb231902supp.pdf]

## Supplemental Tables

**Table S1.** Results of covariates for developmental and post-hatching variables of *A. sagrei*.

| Response                                          | Covariate         | Covariate results |       |          |
|---------------------------------------------------|-------------------|-------------------|-------|----------|
|                                                   |                   | $\beta$ (SE)      | t     | p        |
| Water uptake (mg)                                 | Developmental age | 4.6 (0.75)        | 6.1   | <0.0001  |
| Heart rate (bpm)                                  | Temperature       | 7.98 (2.47)       | 3.2   | 0.002    |
| O <sub>2</sub> consumption at 20.7 °C (microL/hr) | Developmental age | 0.82 (0.16)       | 5.1   | <0.0001  |
| O <sub>2</sub> consumption at 26.3 °C (microL/hr) | Developmental age | 1.38 (0.21)       | 6.6   | <0.0001  |
| SVL (mm)                                          | Initial egg mass  | 0.02 (0.002)      | 13.15 | < 0.0001 |
| Body mass (mg)                                    | Initial egg mass  | 0.69 (0.03)       | 21.3  | < 0.0001 |
| Body condition                                    | Initial egg mass  | 0.002 (0.0002)    | 12.35 | < 0.0001 |
| Tail length (mm)                                  | Initial egg mass  | 0.03 (0.005)      | 7.21  | < 0.0001 |
| Sprint speed (m/s)                                | Initial SVL       | 0.02 (0.006)      | 3.03  | 0.003    |
| Endurance*                                        | Initial SVL       | 0.10 (0.03)       | 3.20  | 0.002    |
| Final SVL (mm)                                    | Initial SVL       | 0.70 (0.07)       | 9.58  | < 0.0001 |

$\beta$  = effect size; SE = standard error; t = t value; p = p value

**Table S2.** Estimated marginal means for developmental and post-hatching variables of *A. sagrei* that were significantly influenced by season, treatment, or the interaction. Asterisk denotes a variable was log-transformed.

| Response                                          | Season   | Treatment | Emmean | SE    |
|---------------------------------------------------|----------|-----------|--------|-------|
| Developmental Rate*                               | Early    | Con       | 2.51   | 0.006 |
|                                                   | Early    | HrM       | 2.57   | 0.005 |
|                                                   | Early    | Nat       | 2.59   | 0.006 |
|                                                   | Early    | Sine      | 2.58   | 0.005 |
|                                                   | Late     | Con       | 3.3    | 0.006 |
|                                                   | Late     | HrM       | 3.32   | 0.006 |
|                                                   | Late     | Nat       | 3.29   | 0.006 |
|                                                   | Late     | Sine      | 3.32   | 0.006 |
| Egg survival (probability)                        | Early    | Combined  | 0.94   | 0.02  |
|                                                   | Late     | Combined  | 0.98   | 0.01  |
| Water uptake (mg)                                 | Early    | Combined  | 260.11 | 7.35  |
|                                                   | Late     | Combined  | 166.22 | 7.35  |
| O <sub>2</sub> consumption at 26.3 °C (microL/hr) | Combined | Con       | 34.32  | 1.04  |
|                                                   | Combined | HrM       | 30.19  | 0.94  |
|                                                   | Combined | Nat       | 30.37  | 0.90  |
|                                                   | Combined | Sine      | 31.13  | 0.90  |
| Endurance (m)*                                    | Early    | Con       | 1.02   | 0.069 |
|                                                   | Early    | HrM       | 1.24   | 0.064 |
|                                                   | Early    | Nat       | 1.36   | 0.065 |
|                                                   | Early    | Sine      | 1.15   | 0.062 |
|                                                   | Late     | Con       | 1.76   | 0.055 |
|                                                   | Late     | HrM       | 1.85   | 0.061 |
|                                                   | Late     | Nat       | 1.72   | 0.058 |
|                                                   | Late     | Sine      | 1.74   | 0.066 |
| Initial body condition                            | Early    | Combined  | -0.034 | 0.005 |
|                                                   | Late     | Combined  | 0.035  | 0.005 |
|                                                   | Combined | Con       | -0.01  | 0.007 |
|                                                   | Combined | HrM       | 0.016  | 0.007 |
|                                                   | Combined | Nat       | 0      | 0.007 |
|                                                   | Combined | Sine      | -0.005 | 0.007 |
| Initial body mass (mg)                            | Early    | Combined  | 172.49 | 0.98  |
|                                                   | Late     | Combined  | 178.51 | 0.98  |

|                                  |          |          |       |       |
|----------------------------------|----------|----------|-------|-------|
| Initial SVL (mm)                 | Early    | Combined | 19.56 | 0.05  |
|                                  | Late     | Combined | 19.19 | 0.05  |
|                                  | Combined | Con      | 19.35 | 0.06  |
|                                  | Combined | HrM      | 19.26 | 0.06  |
|                                  | Combined | Nat      | 19.44 | 0.06  |
|                                  | Combined | Sine     | 19.46 | 0.06  |
| Sprint speed (m/s)               | Early    | Combined | 0.148 | 0.007 |
|                                  | Late     | Combined | 0.203 | 0.006 |
| Hatchling survival (probability) | Early    | Combined | 0.63  | 0.05  |
|                                  | Late     | Combined | 0.93  | 0.02  |
|                                  | Combined | Con      | 0.6   | 0.08  |
|                                  | Combined | HrM      | 0.86  | 0.05  |
|                                  | Combined | Nat      | 0.93  | 0.03  |
|                                  | Combined | Sine     | 0.81  | 0.06  |
| Tail length (mm)                 | Early    | Combined | 30.18 | 0.14  |
|                                  | Late     | Combined | 31.81 | 0.14  |

Con = constant; HrM = hourly means; Nat = natural; Emmean = estimated marginal means; SE = standard error

**Table S3.** Sample size (n), raw mean (Mean), and standard deviation (SD) for all developmental and post-hatching variables according to season and treatment.

| Response                              | Season | Incubation treatment | n  | Mean  | SD   |
|---------------------------------------|--------|----------------------|----|-------|------|
| Heart rate (bpm)                      | Early  | Con                  | 10 | 62.8  | 6.55 |
|                                       | Early  | HrM                  | 10 | 67.2  | 5.98 |
|                                       | Early  | Nat                  | 10 | 64.6  | 5.56 |
|                                       | Early  | Sine                 | 10 | 63.4  | 5.76 |
|                                       | Late   | Con                  | 10 | 62.2  | 4.83 |
|                                       | Late   | HrM                  | 9  | 67.22 | 8.32 |
|                                       | Late   | Nat                  | 10 | 62.5  | 7.06 |
|                                       | Late   | Sine                 | 10 | 66.1  | 5.65 |
| Incubation period (days)              | Early  | Con                  | 46 | 81.5  | 3.75 |
|                                       | Early  | HrM                  | 52 | 76.29 | 3.52 |
|                                       | Early  | Nat                  | 49 | 75.24 | 2.31 |
|                                       | Early  | Sine                 | 52 | 75.96 | 2.94 |
|                                       | Late   | Con                  | 50 | 37.06 | 1.45 |
|                                       | Late   | HrM                  | 47 | 36.51 | 1.33 |
|                                       | Late   | Nat                  | 49 | 37.22 | 1.64 |
|                                       | Late   | Sine                 | 50 | 36.28 | 1.34 |
| O2 consumption (20.7 °C)<br>microL/hr | Early  | Con                  | 12 | 16.13 | 3.29 |
|                                       | Early  | HrM                  | 11 | 17.33 | 3.42 |
|                                       | Early  | Nat                  | 12 | 19.06 | 3.87 |
|                                       | Early  | Sine                 | 12 | 18.85 | 4.05 |
|                                       | Late   | Con                  | 11 | 19.85 | 4.02 |
|                                       | Late   | HrM                  | 11 | 21.44 | 3.57 |
|                                       | Late   | Nat                  | 12 | 18.68 | 3.22 |
|                                       | Late   | Sine                 | 12 | 21.78 | 3.87 |
| O2 consumption (26.3 °C)<br>microL/hr | Early  | Con                  | 12 | 26.25 | 3.01 |
|                                       | Early  | HrM                  | 11 | 28.37 | 4.66 |
|                                       | Early  | Nat                  | 12 | 28.98 | 7.26 |
|                                       | Early  | Sine                 | 12 | 29.62 | 4.65 |
|                                       | Late   | Con                  | 11 | 35.24 | 3.84 |
|                                       | Late   | HrM                  | 11 | 34.41 | 6.36 |
|                                       | Late   | Nat                  | 12 | 32.74 | 5.42 |
|                                       | Late   | Sine                 | 12 | 34.89 | 5.39 |
| Survival (probability)                | Early  | Con                  | 54 | 0.85  |      |
|                                       | Early  | HrM                  | 55 | 0.95  |      |
|                                       | Early  | Nat                  | 51 | 0.96  |      |
|                                       | Early  | Sine                 | 54 | 0.96  |      |
|                                       | Late   | Con                  | 51 | 0.98  |      |
|                                       | Late   | HrM                  | 50 | 0.94  |      |
|                                       | Late   | Nat                  | 50 | 0.98  |      |
|                                       | Late   | Sine                 | 50 | 1     |      |
| Water uptake (mg)                     | Early  | Con                  | 12 | 259.2 | 64.4 |
|                                       | Early  | HrM                  | 12 | 260.3 | 88.1 |
|                                       | Early  | Nat                  | 12 | 308.1 | 42.9 |
|                                       | Early  | Sine                 | 12 | 258.3 | 45.6 |
|                                       | Late   | Con                  | 12 | 133.5 | 28.5 |
|                                       | Late   | HrM                  | 12 | 150.8 | 47.4 |
|                                       | Late   | Nat                  | 12 | 158.3 | 62.6 |
|                                       | Late   | Sine                 | 12 | 176.7 | 62.4 |

|                                  |       |      |    |        |       |
|----------------------------------|-------|------|----|--------|-------|
| Endurance (m)                    | Early | Con  | 30 | 3.05   | 1.27  |
|                                  | Early | HrM  | 35 | 3.7    | 1.27  |
|                                  | Early | Nat  | 34 | 4.2    | 1.41  |
|                                  | Early | Sine | 38 | 3.59   | 1.48  |
|                                  | Late  | Con  | 47 | 6.07   | 2.08  |
|                                  | Late  | HrM  | 39 | 6.64   | 2.32  |
|                                  | Late  | Nat  | 42 | 5.95   | 2.17  |
|                                  | Late  | Sine | 33 | 5.92   | 1.8   |
| Final SVL (mm)                   | Early | Con  | 8  | 20.84  | 1.04  |
|                                  | Early | Nat  | 22 | 20.62  | 0.81  |
|                                  | Early | HrM  | 17 | 20.54  | 0.74  |
|                                  | Early | Sine | 15 | 21.02  | 0.77  |
|                                  | Late  | Con  | 21 | 20.46  | 0.95  |
|                                  | Late  | Nat  | 23 | 20.34  | 0.79  |
|                                  | Late  | HrM  | 24 | 20.48  | 0.84  |
|                                  | Late  | Sine | 24 | 20.54  | 0.71  |
| Initial body condition           | Early | Con  | 46 | -0.05  | 0.086 |
|                                  | Early | HrM  | 52 | -0.016 | 0.092 |
|                                  | Early | Nat  | 49 | -0.03  | 0.072 |
|                                  | Early | Sine | 52 | -0.033 | 0.07  |
|                                  | Late  | Con  | 50 | 0.023  | 0.075 |
|                                  | Late  | HrM  | 47 | 0.046  | 0.069 |
|                                  | Late  | Nat  | 49 | 0.024  | 0.082 |
|                                  | Late  | Sine | 50 | 0.036  | 0.072 |
| Initial body mass (mg)           | Early | Con  | 46 | 170.09 | 21.22 |
|                                  | Early | HrM  | 52 | 172.6  | 20.37 |
|                                  | Early | Nat  | 49 | 175.65 | 17.63 |
|                                  | Early | Sine | 52 | 175.48 | 16.79 |
|                                  | Late  | Con  | 50 | 174.73 | 17.52 |
|                                  | Late  | HrM  | 47 | 179.85 | 17.71 |
|                                  | Late  | Nat  | 49 | 175.74 | 20.73 |
|                                  | Late  | Sine | 50 | 181    | 19.5  |
| Initial SVL (mm)                 | Early | Con  | 46 | 19.57  | 1.01  |
|                                  | Early | HrM  | 52 | 19.36  | 0.74  |
|                                  | Early | Nat  | 49 | 19.72  | 0.71  |
|                                  | Early | Sine | 52 | 19.75  | 0.67  |
|                                  | Late  | Con  | 50 | 19.09  | 0.64  |
|                                  | Late  | HrM  | 47 | 19.15  | 0.62  |
|                                  | Late  | Nat  | 49 | 19.13  | 0.67  |
|                                  | Late  | Sine | 50 | 19.32  | 0.66  |
| Sprint speed (m/s)               | Early | Con  | 29 | 0.13   | 0.075 |
|                                  | Early | HrM  | 35 | 0.154  | 0.077 |
|                                  | Early | Nat  | 34 | 0.16   | 0.074 |
|                                  | Early | Sine | 38 | 0.162  | 0.095 |
|                                  | Late  | Con  | 43 | 0.186  | 0.074 |
|                                  | Late  | HrM  | 37 | 0.223  | 0.081 |
|                                  | Late  | Nat  | 40 | 0.197  | 0.082 |
|                                  | Late  | Sine | 31 | 0.194  | 0.071 |
| Hatchling survival (probability) | Early | Con  | 25 | 0.32   |       |
|                                  | Early | Nat  | 25 | 0.88   |       |
|                                  | Early | HrM  | 25 | 0.68   |       |
|                                  | Early | Sine | 25 | 0.6    |       |

|                  |       |      |    |       |      |
|------------------|-------|------|----|-------|------|
| Tail length (mm) | Late  | Con  | 25 | 0.84  |      |
|                  | Late  | Nat  | 25 | 0.92  |      |
|                  | Late  | Hrm  | 25 | 0.96  |      |
|                  | Late  | Sine | 26 | 0.92  |      |
|                  | Early | Con  | 46 | 30.00 | 2.37 |
|                  | Early | HrM  | 51 | 29.75 | 1.71 |
|                  | Early | Nat  | 49 | 30.58 | 1.86 |
|                  | Early | Sine | 52 | 30.39 | 2.05 |
|                  | Late  | Con  | 50 | 32.05 | 1.68 |
|                  | Late  | HrM  | 47 | 31.73 | 1.98 |
|                  | Late  | Nat  | 49 | 31.63 | 1.65 |
|                  | Late  | Sine | 50 | 31.91 | 1.47 |

Con = constant; HrM = hourly means; Nat = natural

## Supplemental Figures

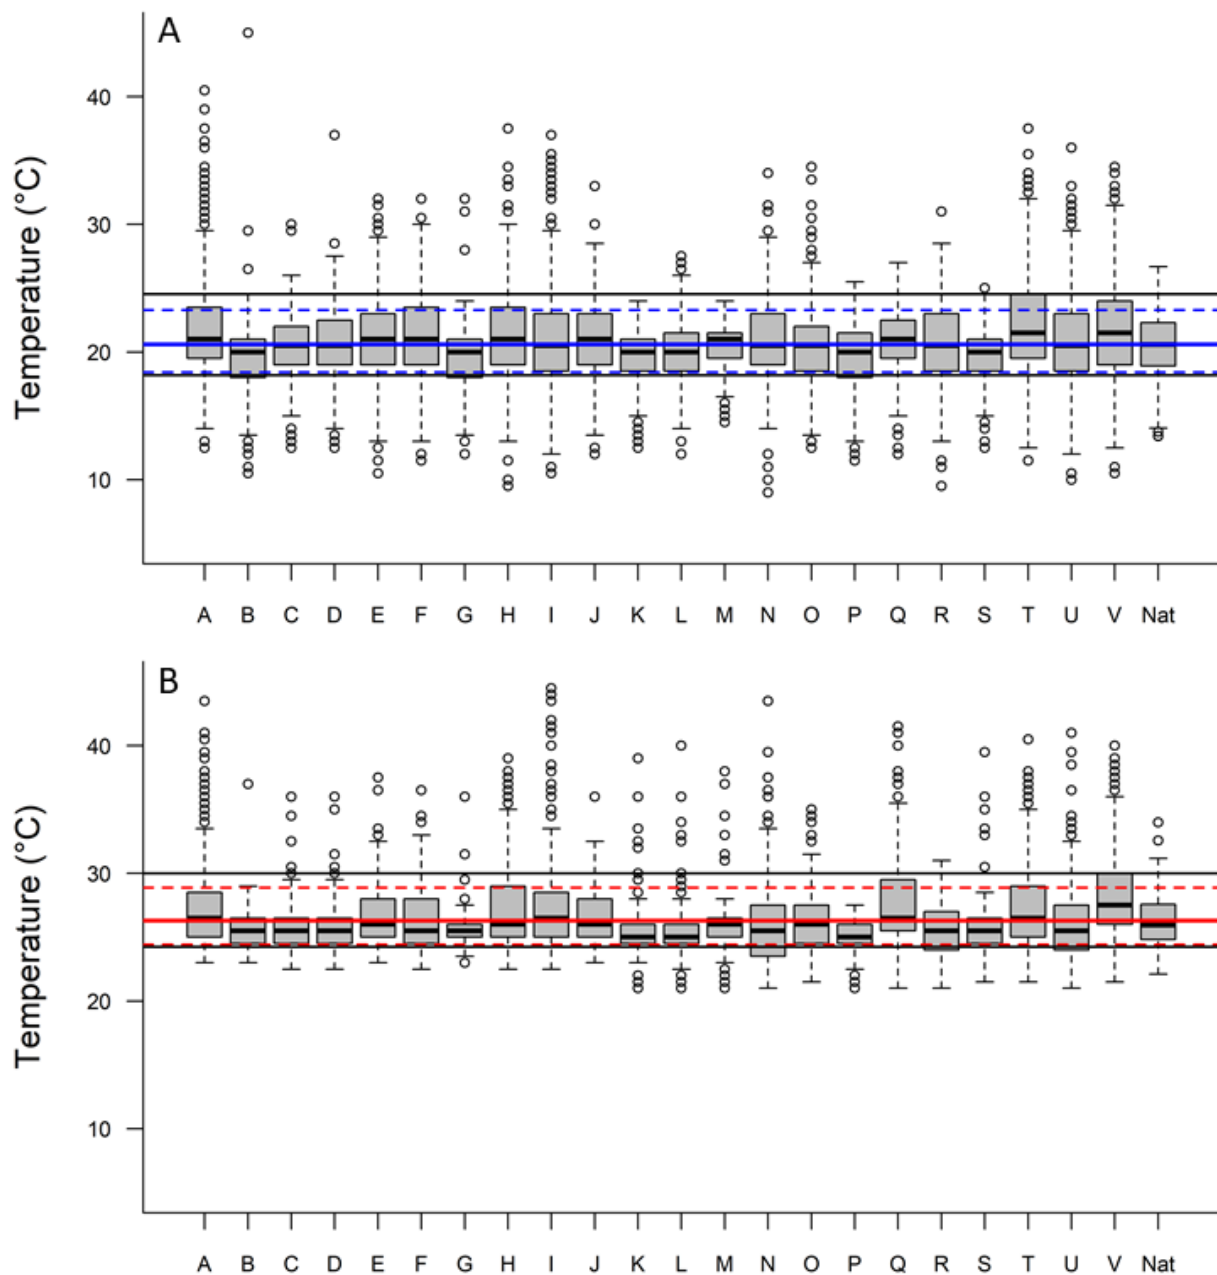

**Figure S1.** Nest temperatures of the 22 nests used to create the incubation regimes (A-V). Note that on the far right of each panel are the temperatures from the early (Panel A) and late (Panel B) Natural incubation treatments used in this study (i.e. “Nat”). Panel A shows temperatures collected from nests early in the season and panel B shows nest temperatures collected late in the season. Solid blue and red lines show the mean temperatures of each seasonal regime: 20.7 and 26.3 °C, respectively. Broken blue and red lines denote the mean daily maximum and minimum temperatures from the early and late season Natural incubation treatments, respectively. Solid black lines show the mean daily maximum and minimum temperatures across all 22 nests.

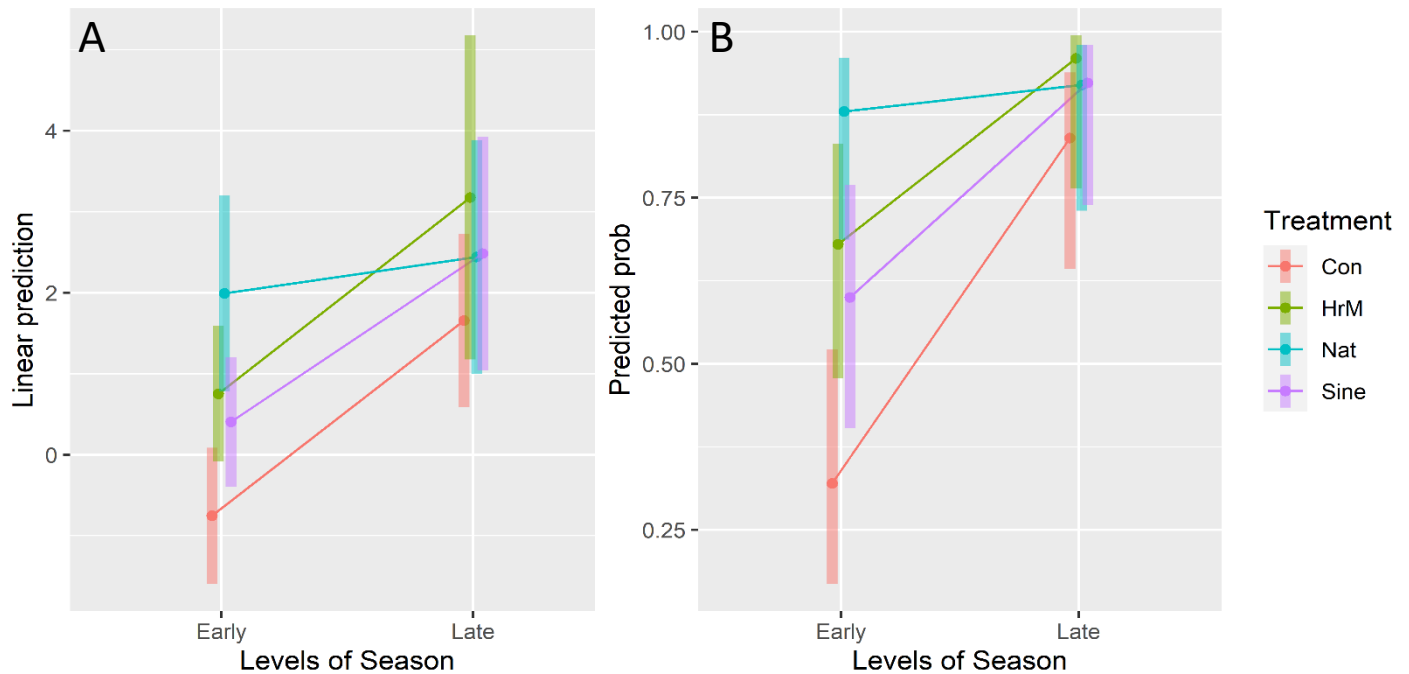

**Figure S2.** Potential effect of the interaction between season and treatment on hatchling survival shown on the (A) linear prediction scale and (B) response scale. Note that the response scale (B) exaggerates the differences among treatments (i.e. slopes) due to boundary issues. The statistical test is conducted on the linear prediction scale (A) and not the response scale (B). Despite the large effect size, the interaction term was not statistically significant when independently analyzed in R (by JMH;  $p = 0.42$ ), SAS (by DAW;  $p = 0.38$ ), and SPSS (by CJ Thawley;  $p = 0.43$ ). Regardless, post-hoc inspection indicates there are important statistical differences among groups (see Figures S3, S4). Closed circles show the estimated marginal means and bars are the 95% confidence intervals (calculated with the 'emmeans' package in R).

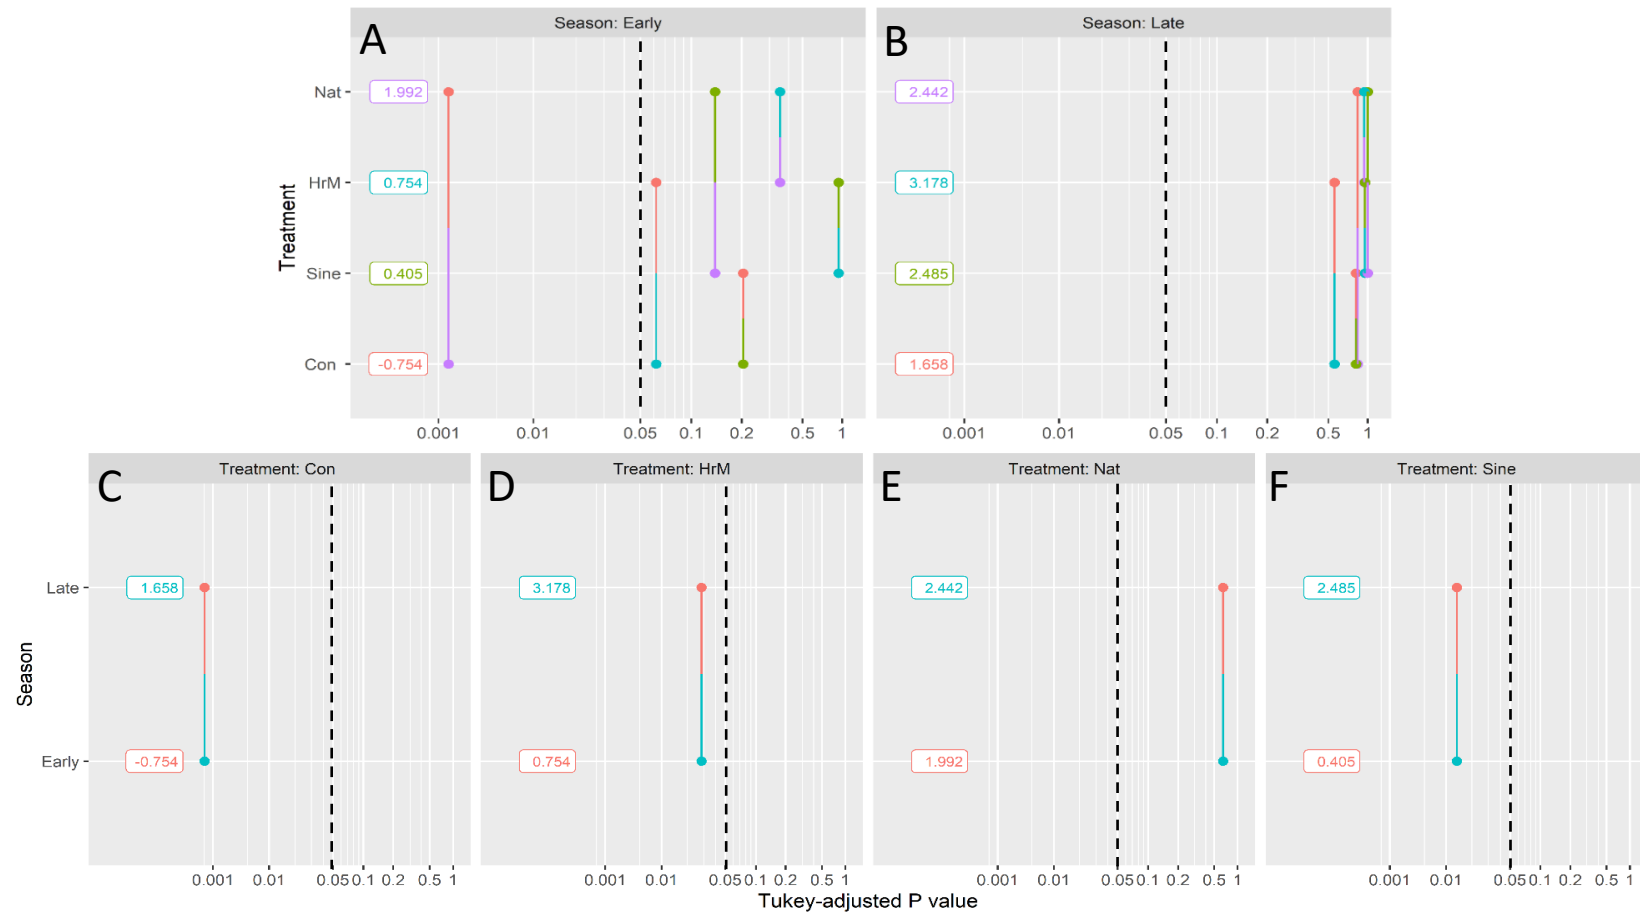

**Figure S3.** Tukey-adjusted p values for season contrasts of early (A) and late (B) season incubation temperatures and constant (C) hourly means (D) natural (E) and sine (F) incubation temperatures regarding hatchling survival. The vertical dotted lines denote a statistically significant p value ( $p = 0.05$ ). Despite the non-significant interaction term (season by treatment); the post-hoc analysis demonstrates a significant difference between the constant and natural treatments for early season (A) but not late season (B) temperatures and a significant season effect for all treatments except the natural treatment (C-F). Vertical solid lines and closed circles denote the various contrasts. Values at the left of each panel are the estimated marginal means of the linear predictions for each treatment calculated using the ‘emmeans’ package in R. Con = constant; HrM = hourly means; Nat = natural
